# Supplementary material
Source: PubMed Central journal article supplement (PMC7656279)
Supplement: jama-e2019181-s001.pdf [file jama-e2019181-s001.pdf]

## Supplemental Online Content

Barnett ML, Joynt Maddox KE, Orav EJ, Grabowski DC, Epstein AM. Association of skilled nursing facility participation in a bundled payment model with institutional spending for joint replacement surgery. *JAMA*. doi:10.1001/jama.2020.19181

**eFigure 1.** Schematic of Pre- and Post-intervention Period Definition for Main Analysis, 2013 Baseline

**eFigure 2.** Schematic of Pre- and Post-intervention Study Periods, Sensitivity Analysis

**eFigure 3.** Trends in Institutional Payment and Difference-in-Differences Estimates in BPCI Model 3 During the Study Period

**eTable 1.** Pre-period Outcome Trends, Intervention and Matched Control BPCI SNFs

**eTable 2.** Treatment-on-Treated Sensitivity Analyses

**eTable 3.** Other Sensitivity Analyses

This supplemental material has been provided by the authors to give readers additional information about their work.

eFigure 1: Schematic of pre- and post-intervention period definition for main analysis, 2013 baseline

|                       |         | Calendar Quarter                       |                                        |                                        |         |                   |                   |                   |                   |                   |                   |                   |                   |                   |                   |                   |                                            |
|-----------------------|---------|----------------------------------------|----------------------------------------|----------------------------------------|---------|-------------------|-------------------|-------------------|-------------------|-------------------|-------------------|-------------------|-------------------|-------------------|-------------------|-------------------|--------------------------------------------|
|                       |         | 1/1/13                                 | 4/1/13                                 | 7/1/13                                 | 10/1/13 | 1/1/14            | 4/1/14            | 7/1/14            | 10/1/14           | 1/1/15            | 4/1/15            | 7/1/15            | 10/1/15           | 1/1/16            | 4/1/16            | 7/1/16            | 10/1/16                                    |
| BPCI<br>Start<br>Date | 1/1/14  | Baseline Matching and Pre-Intervention | Baseline Matching and Pre-Intervention | Baseline Matching and Pre-Intervention |         | Post-BPCI Washout | Post-Intervention | Not Included - less than 90-days follow-up |
|                       | 4/1/14  | Baseline Matching and Pre-Intervention | Baseline Matching and Pre-Intervention | Baseline Matching and Pre-Intervention |         |                   | Post-BPCI Washout | Post-Intervention | Not Included - less than 90-days follow-up |
|                       | 7/1/14  | Baseline Matching and Pre-Intervention | Baseline Matching and Pre-Intervention | Baseline Matching and Pre-Intervention |         |                   |                   | Post-BPCI Washout | Post-Intervention | Not Included - less than 90-days follow-up |
|                       | 10/1/14 | Baseline Matching and Pre-Intervention | Baseline Matching and Pre-Intervention | Baseline Matching and Pre-Intervention |         |                   |                   |                   | Post-BPCI Washout | Post-Intervention | Not Included - less than 90-days follow-up |
|                       | 1/1/15  | Baseline Matching and Pre-Intervention | Baseline Matching and Pre-Intervention | Baseline Matching and Pre-Intervention |         |                   |                   |                   |                   | Post-BPCI Washout | Post-Intervention | Post-Intervention | Post-Intervention | Post-Intervention | Post-Intervention | Post-Intervention | Not Included - less than 90-days follow-up |
|                       | 4/1/15  | Baseline Matching and Pre-Intervention | Baseline Matching and Pre-Intervention | Baseline Matching and Pre-Intervention |         |                   |                   |                   |                   |                   |                   | Post-BPCI Washout | Post-Intervention | Post-Intervention | Post-Intervention | Post-Intervention | Not Included - less than 90-days follow-up |
|                       | 7/1/15  | Baseline Matching and Pre-Intervention | Baseline Matching and Pre-Intervention | Baseline Matching and Pre-Intervention |         |                   |                   |                   |                   |                   |                   |                   | Post-BPCI Washout | Post-Intervention | Post-Intervention | Post-Intervention | Not Included - less than 90-days follow-up |
|                       | 10/1/15 | Baseline Matching and Pre-Intervention | Baseline Matching and Pre-Intervention | Baseline Matching and Pre-Intervention |         |                   |                   |                   |                   |                   |                   |                   |                   | Post-BPCI Washout | Post-Intervention | Post-Intervention | Not Included - less than 90-days follow-up |
|                       | 1/1/16  | Baseline Matching and Pre-Intervention | Baseline Matching and Pre-Intervention | Baseline Matching and Pre-Intervention |         |                   |                   |                   |                   |                   |                   |                   |                   |                   | Post-BPCI Washout | Post-Intervention | Not Included - less than 90-days follow-up |
|                       | 4/1/16  | Baseline Matching and Pre-Intervention | Baseline Matching and Pre-Intervention | Baseline Matching and Pre-Intervention |         |                   |                   |                   |                   |                   |                   |                   |                   |                   |                   | Post-BPCI Washout | Post-Intervention                          |

Abbreviations: Bundled Payment for Care Improvement (BPCI)

This is a schematic representation of the time periods used in the *main analysis* for pre-BPCI intervention and post-BPCI periods across the cohorts of SNF BPCI entrants from 2014 through 2016. Each row represents a different start date when SNFs could enter the BPCI program, starting on 1/1/2014. For each of these periods, the corresponding time period definitions is shown schematically – the fixed baseline matching and pre-intervention period (yellow), the post-intervention period (green) and dropped periods (light green).

Data to perform matching and the pre-intervention period both overlap in the first 3 quarters of 2013.

eFigure 2: Schematic of pre- and post-intervention study periods, sensitivity analysis

|                       |         | Calendar Quarter                       |                                        |                                        |                                        |                   |                   |                   |                   |                   |                   |                   |                   |                   |                   |                   |                                            |
|-----------------------|---------|----------------------------------------|----------------------------------------|----------------------------------------|----------------------------------------|-------------------|-------------------|-------------------|-------------------|-------------------|-------------------|-------------------|-------------------|-------------------|-------------------|-------------------|--------------------------------------------|
|                       |         | 1/1/13                                 | 4/1/13                                 | 7/1/13                                 | 10/1/13                                | 1/1/14            | 4/1/14            | 7/1/14            | 10/1/14           | 1/1/15            | 4/1/15            | 7/1/15            | 10/1/15           | 1/1/16            | 4/1/16            | 7/1/16            | 10/1/16                                    |
| BPCI<br>Start<br>Date | 1/1/14  | Baseline Matching and Pre-Intervention | Baseline Matching and Pre-Intervention | Baseline Matching and Pre-Intervention | Pre-BPCI Washout                       | Post-BPCI Washout | Post-Intervention | Not Included - less than 90-days follow-up |
|                       | 4/1/14  | Baseline for Matching                  | Baseline Matching and Pre-Intervention | Baseline Matching and Pre-Intervention | Baseline Matching and Pre-Intervention | Pre-BPCI Washout  | Post-BPCI Washout | Post-Intervention | Not Included - less than 90-days follow-up |
|                       | 7/1/14  | Baseline for Matching                  | Baseline for Matching                  | Baseline Matching and Pre-Intervention | Baseline Matching and Pre-Intervention | Pre-Intervention  | Pre-BPCI Washout  | Post-BPCI Washout | Post-Intervention | Not Included - less than 90-days follow-up |
|                       | 10/1/14 | Baseline for Matching                  | Baseline for Matching                  | Baseline for Matching                  | Baseline Matching and Pre-Intervention | Pre-Intervention  | Pre-Intervention  | Pre-BPCI Washout  | Post-BPCI Washout | Post-Intervention | Not Included - less than 90-days follow-up |
|                       | 1/1/15  | Baseline for Matching                  | Baseline for Matching                  | Baseline for Matching                  | Baseline for Matching                  | Pre-Intervention  | Pre-Intervention  | Pre-Intervention  | Pre-BPCI Washout  | Post-BPCI Washout | Post-Intervention | Post-Intervention | Post-Intervention | Post-Intervention | Post-Intervention | Post-Intervention | Not Included - less than 90-days follow-up |
|                       | 4/1/15  | Baseline for Matching                  | Baseline for Matching                  | Baseline for Matching                  | Baseline for Matching                  |                   | Pre-Intervention  | Pre-Intervention  | Pre-Intervention  | Pre-BPCI Washout  | Post-BPCI Washout | Post-Intervention | Post-Intervention | Post-Intervention | Post-Intervention | Post-Intervention | Not Included - less than 90-days follow-up |
|                       | 7/1/15  | Baseline for Matching                  | Baseline for Matching                  | Baseline for Matching                  | Baseline for Matching                  |                   |                   | Pre-Intervention  | Pre-Intervention  | Pre-Intervention  | Pre-BPCI Washout  | Post-BPCI Washout | Post-Intervention | Post-Intervention | Post-Intervention | Post-Intervention | Not Included - less than 90-days follow-up |
|                       | 10/1/15 | Baseline for Matching                  | Baseline for Matching                  | Baseline for Matching                  | Baseline for Matching                  |                   |                   |                   | Pre-Intervention  | Pre-Intervention  | Pre-Intervention  | Pre-BPCI Washout  | Post-BPCI Washout | Post-Intervention | Post-Intervention | Post-Intervention | Not Included - less than 90-days follow-up |
|                       | 1/1/16  | Baseline for Matching                  | Baseline for Matching                  | Baseline for Matching                  | Baseline for Matching                  |                   |                   |                   |                   | Pre-Intervention  | Pre-Intervention  | Pre-Intervention  | Pre-BPCI Washout  | Post-BPCI Washout | Post-Intervention | Post-Intervention | Not Included - less than 90-days follow-up |
|                       | 4/1/16  | Baseline for Matching                  | Baseline for Matching                  | Baseline for Matching                  | Baseline for Matching                  |                   |                   |                   |                   |                   | Pre-Intervention  | Pre-Intervention  | Pre-Intervention  | Pre-BPCI Washout  | Post-BPCI Washout | Post-Intervention | Not Included - less than 90-days follow-up |

Abbreviations: Bundled Payment for Care Improvement (BPCI)

This is a schematic representation of the time periods used in the *sensitivity analysis* in eTable 2 for pre-BPCI intervention and post-BPCI periods across the cohorts of SNF BPCI entrants from 2014 through 2016.

Each row represents a different start date when SNFs could enter the BPCI program, starting on 1/1/2014. For each of these periods, the corresponding time period definitions is shown schematically – the variable baseline matching period (red) and pre-interventions periods (dark yellow), the post-intervention period (green) and dropped periods (light yellow and light green).

eFigure 3: Trends in Institutional Payment and Difference-in-Differences Estimates in BPCI Model 3 during the Study Period

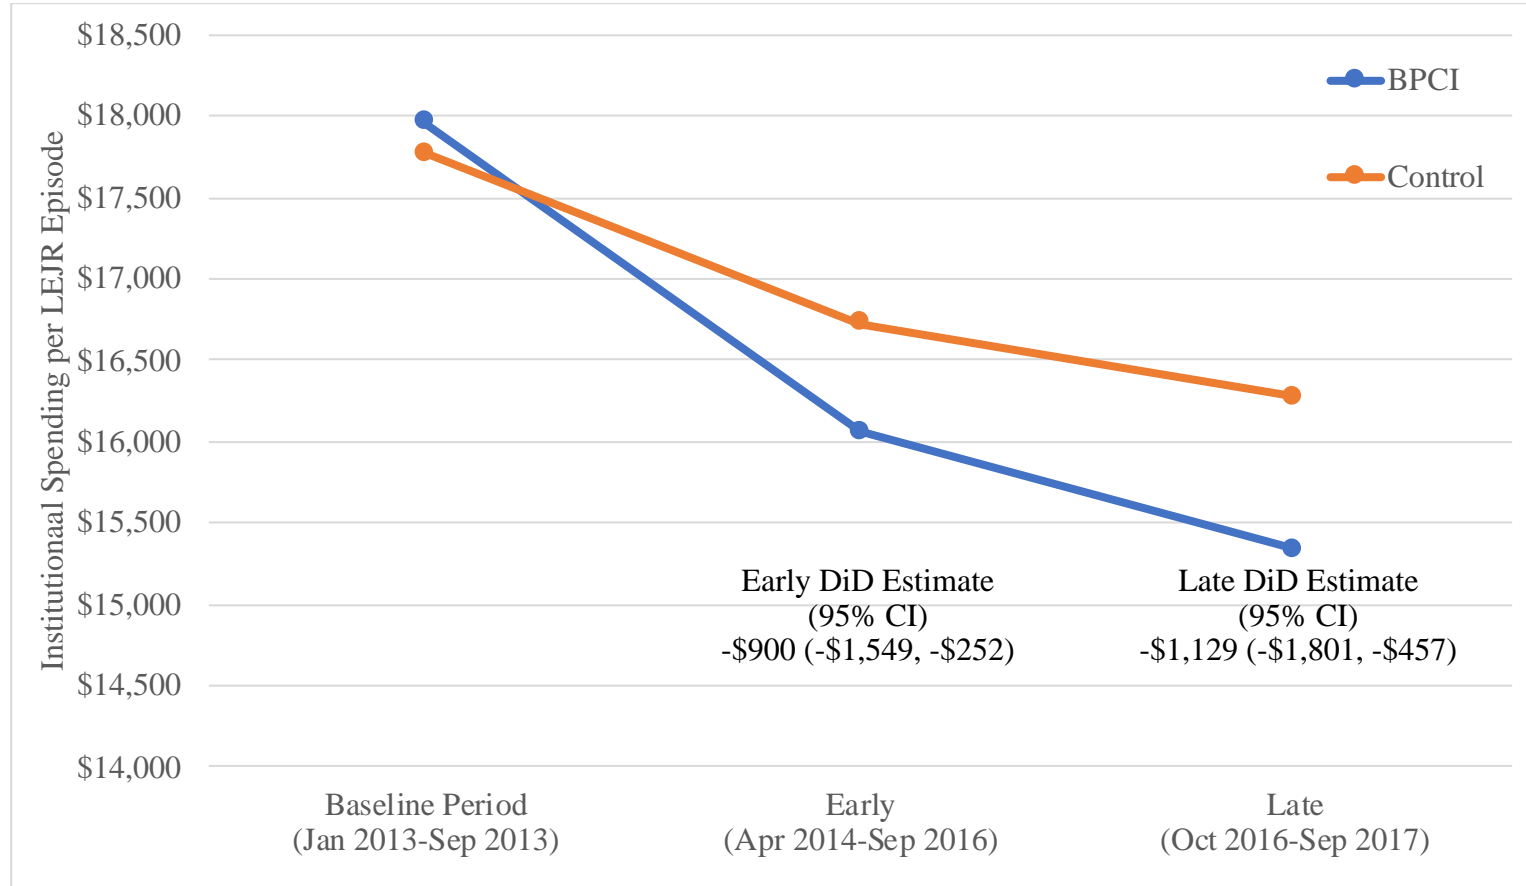

Abbreviations: Bundled Payment for Care Improvement (BPCI), 95% confidence interval (95% CI), emergency department (ED), skilled nursing facility (SNF)

This shows average institutional spending per LEJR episode for SNFs in BPCI and matched controls in three time periods during the study period: baseline (January 1, 2013 – September 30, 2013), “early” BPCI (April 1, 2014 – September 30, 2016) and “late” BPCI (October 1, 2016 – September 30, 2017). The early and late periods have similar numbers of episodes (early: 7,211 BPCI and 26,562 control; late: 6,103 BPCI and 22,881 control). Post-hoc difference-in-difference estimates for the early and late periods using the same model as the primary outcome analysis are shown in the Figure.

eTable 1: Pre-period outcome trends, intervention and matched control BPCI SNFs

|                                                       | BPCI          |         | Matched Controls |         | Difference           |              |              |         |
|-------------------------------------------------------|---------------|---------|------------------|---------|----------------------|--------------|--------------|---------|
|                                                       | Monthly Trend | P-value | Monthly Trend    | P-value | Difference in Trends | Lower 95% CI | Upper 95% CI | P value |
| <b>Primary Outcome</b>                                |               |         |                  |         |                      |              |              |         |
| Total institutional spending over 90-d episode        | -\$11         | 0.875   | -\$23            | 0.537   | -\$3                 | -\$180       | \$173        | 0.970   |
| <b>Secondary Payment Outcomes</b>                     |               |         |                  |         |                      |              |              |         |
| Initial SNF stay                                      | \$52          | 0.276   | \$30             | 0.244   | \$2                  | -\$115       | \$119        | 0.979   |
| Subsequent SNF stays                                  | -\$13         | 0.717   | -\$20            | 0.184   | \$16                 | -\$64        | \$96         | 0.689   |
| Overall SNF spending (initial + subsequent)           | \$39          | 0.479   | \$10             | 0.747   | \$18                 | -\$122       | \$158        | 0.802   |
| Readmission                                           | \$6           | 0.799   | -\$4             | 0.544   | \$4                  | -\$36        | \$44         | 0.840   |
| Inpatient rehabilitation facility                     | \$12          | 0.088   | -\$2             | 0.728   | \$16                 | \$0          | \$33         | 0.053   |
| Long term acute care hospital                         | -\$4          | 0.688   | \$2              | 0.676   | -\$4                 | -\$25        | \$17         | 0.697   |
| Home health agency                                    | -\$63         | 0.020   | -\$28            | 0.077   | -\$38                | -\$103       | \$27         | 0.257   |
| Durable medical equipment                             | -\$1.05       | 0.003   | -\$0.82          | 0.000   | -\$0.12              | -\$0.90      | \$0.66       | 0.758   |
| <b>Utilization and Discharge Outcomes</b>             |               |         |                  |         |                      |              |              |         |
| Average Length of Stay, Initial SNF Admission (Days)  | 0.016         | 0.867   | 0.059            | 0.236   | -0.026               | -0.257       | 0.206        | 0.828   |
| Average Number of SNF Days, Full Bundle Period (Days) | 0.017         | 0.864   | 0.017            | 0.748   | -0.015               | -0.266       | 0.236        | 0.905   |
| Average Days at Home during Bundle Period (Days)      | 0.039         | 0.915   | 0.302            | 0.123   | -0.475               | -1.400       | 0.451        | 0.315   |
| Discharged Home after Initial SNF Stay (%)            | -0.2%         | 0.342   | 0.1%             | 0.498   | -0.2%                | -0.9%        | 0.5%         | 0.551   |

|                                                   |                      |                |                         |                |                             |                     |                     |                |
|---------------------------------------------------|----------------------|----------------|-------------------------|----------------|-----------------------------|---------------------|---------------------|----------------|
| Use of Home Health Agency after SNF Discharge (%) | -0.3%                | 0.282          | -0.1%                   | 0.436          | -0.1%                       | -0.7%               | 0.5%                | 0.777          |
|                                                   | <b>BPCI</b>          |                | <b>Matched Controls</b> |                | <b>Difference</b>           |                     |                     |                |
|                                                   | <b>Monthly Trend</b> | <b>P-value</b> | <b>Monthly Trend</b>    | <b>P-value</b> | <b>Difference in Trends</b> | <b>Lower 95% CI</b> | <b>Upper 95% CI</b> | <b>P value</b> |
| <b>Patient Outcomes</b>                           |                      |                |                         |                |                             |                     |                     |                |
| ED Use without Admission                          |                      |                |                         |                |                             |                     |                     |                |
| 30 Day                                            | 0.45%                | 0.258          | 0.00%                   | 0.993          | 0.44%                       | -0.43%              | 1.31%               | 0.321          |
| 90 Day                                            | 0.21%                | 0.391          | 0.01%                   | 0.939          | 0.19%                       | -0.38%              | 0.76%               | 0.507          |
| Inpatient Readmission                             |                      |                |                         |                |                             |                     |                     |                |
| 30 Day                                            | -0.33%               | 0.074          | -0.20%                  | 0.060          | -0.15%                      | -0.59%              | 0.30%               | 0.520          |
| 90 Day                                            | -0.09%               | 0.503          | -0.14%                  | 0.075          | 0.02%                       | -0.30%              | 0.34%               | 0.885          |
| Mortality                                         |                      |                |                         |                |                             |                     |                     |                |
| 30 Day                                            | 0.00%                | 0.967          | -0.03%                  | 0.436          | 0.03%                       | -0.14%              | 0.19%               | 0.766          |
| 90 Day                                            | -0.16%               | 0.158          | -0.06%                  | 0.256          | -0.14%                      | -0.40%              | 0.13%               | 0.320          |

eTable 2: Treatment-on-treated sensitivity analyses

|                                                       | BPCI            |                     |                       | Matched Controls |                     |                       | Adjusted Differential Change |              |              |
|-------------------------------------------------------|-----------------|---------------------|-----------------------|------------------|---------------------|-----------------------|------------------------------|--------------|--------------|
|                                                       | Baseline Period | Intervention Period | Unadjusted Difference | Baseline Period  | Intervention Period | Unadjusted Difference | Difference-in-Differences    | Lower 95% CI | Upper 95% CI |
| <b>Primary Outcome</b>                                |                 |                     |                       |                  |                     |                       |                              |              |              |
| Total institutional spending over 90-d episode        | \$17,636        | \$15,406            | -\$2,230              | \$17,593         | \$16,450            | -\$1,143              | -\$1,088                     | -\$1,742     | -\$433       |
| <b>Secondary Payment Outcomes</b>                     |                 |                     |                       |                  |                     |                       |                              |              |              |
| Overall SNF spending (initial + subsequent)           | \$11,915        | \$9,915             | -\$2,000              | \$11,920         | \$10,780            | -\$1,140              | -\$860                       | -\$1,319     | -\$400       |
| Initial SNF stay                                      | \$1,798         | \$1,629             | -\$169                | \$1,847          | \$1,889             | \$42                  | -\$210                       | -\$487       | \$66         |
| Subsequent SNF stays                                  | \$13,713        | \$11,544            | -\$2,168              | \$13,766         | \$12,668            | -\$1,098              | -\$1,070                     | -\$1,590     | -\$550       |
| Readmission                                           | \$1,896         | \$1,897             | \$1                   | \$1,938          | \$2,038             | \$100                 | -\$99                        | -\$326       | \$128        |
| Inpatient rehabilitation facility                     | \$208           | \$146               | -\$62                 | \$123            | \$134               | \$11                  | -\$73                        | -\$266       | \$120        |
| Long term acute care hospital                         | \$136           | \$206               | \$69                  | \$152            | \$194               | \$42                  | \$27                         | -\$56        | \$110        |
| Home health agency                                    | \$1,635         | \$1,586             | -\$49                 | \$1,567          | \$1,390             | -\$177                | \$128                        | \$42         | \$213        |
| Durable medical equipment                             | \$47            | \$27                | -\$20                 | \$47             | \$26                | -\$21                 | \$0                          | -\$3         | \$3          |
| <b>Utilization and Discharge Outcomes</b>             |                 |                     |                       |                  |                     |                       |                              |              |              |
| Average Length of Stay, Initial SNF Admission (Days)  | 21.5            | 16.9                | -4.6                  | 21.9             | 19.0                | -2.90                 | -1.7                         | -2.7         | -0.7         |
| Average Number of SNF Days, Full Bundle Period (Days) | 25.7            | 20.7                | -5.0                  | 26.0             | 23.2                | -2.80                 | -2.2                         | -3.2         | -1.2         |
| Average Days at Home during Bundle Period (Days)      | 60.4            | 65.9                | 5.4                   | 60.1             | 63.0                | 2.95                  | 2.5                          | 1.30         | 3.65         |
| Discharged Home after Initial SNF Stay (%)            | 69.7%           | 61.4%               | -8.2%                 | 68.1%            | 65.3%               | -2.8%                 | -5.4%                        | -9.2%        | -1.6%        |
| Use of Home Health Agency after SNF Discharge (%)     | 52.0%           | 60.3%               | 8.3%                  | 49.9%            | 53.8%               | 3.8%                  | 4.4%                         | 2.0%         | 6.9%         |

|                          | BPCI            |                     |                       | Matched Controls |                     |                       | Adjusted Differential Change |              |              |
|--------------------------|-----------------|---------------------|-----------------------|------------------|---------------------|-----------------------|------------------------------|--------------|--------------|
|                          | Baseline Period | Intervention Period | Unadjusted Difference | Baseline Period  | Intervention Period | Unadjusted Difference | Difference-in-Differences    | Lower 95% CI | Upper 95% CI |
| <b>Patient Outcomes</b>  |                 |                     |                       |                  |                     |                       |                              |              |              |
| ED Use without Admission |                 |                     |                       |                  |                     |                       |                              |              |              |
| 30 Day                   | 2.5%            | 3.4%                | 0.8%                  | 2.5%             | 2.9%                | 0.4%                  | 0.42%                        | -0.19%       | 1.03%        |
| 90 Day                   | 0.9%            | 1.1%                | 0.1%                  | 1.1%             | 1.2%                | 0.1%                  | 0.07%                        | -0.31%       | 0.46%        |
| Inpatient Readmission    |                 |                     |                       |                  |                     |                       |                              |              |              |
| 30 Day                   | 15.9%           | 16.1%               | 0.2%                  | 16.3%            | 17.1%               | 0.8%                  | -0.6%                        | -2.1%        | 0.9%         |
| 90 Day                   | 7.8%            | 6.8%                | -1.0%                 | 8.7%             | 8.2%                | -0.5%                 | -0.5%                        | -1.7%        | 0.6%         |
| Mortality                |                 |                     |                       |                  |                     |                       |                              |              |              |
| 30 Day                   | 2.0%            | 1.5%                | -0.5%                 | 1.9%             | 1.7%                | -0.2%                 | -0.3%                        | -0.9%        | 0.2%         |
| 90 Day                   | 4.5%            | 3.6%                | -0.9%                 | 4.6%             | 4.1%                | -0.5%                 | -0.4%                        | -1.2%        | 0.4%         |

Abbreviations: Bundled Payment for Care Improvement (BPCI), 95% confidence interval (95% CI), emergency department (ED), skilled nursing facility (SNF)

Adjusted estimates show the differential change in spending outcomes during the 90-day post-admission bundle period between treatment and control groups after vs. before BPCI implementation. In contrast to the main analysis, these estimates exclude any SNF-quarters where SNFs were not enrolled in BPCI, including post-BPCI dropout quarters. All estimates use standard errors clustered at the SNF level. The differential change estimates can be interpreted as the average within-SNF change attributable to BPCI implementation. For outcome definitions, see Tables 3-5 in the main manuscript.



eTable 3: Other sensitivity analyses

|                                                       | Main Analysis in Manuscript | Alternate Time Definition (eFigure 2) | Excluding all Admissions from BPCI Model 2 Hospitals | Excluding all Admissions from CJR Hospitals | Only Including SNFs in a Chain | Only Including SNFs NOT in a Chain | Main Analysis without Winsorizing Costs |
|-------------------------------------------------------|-----------------------------|---------------------------------------|------------------------------------------------------|---------------------------------------------|--------------------------------|------------------------------------|-----------------------------------------|
| BPCI Intervention Period Episodes (n)                 | 13314                       | 13314                                 | 10156                                                | 9751                                        | 10139                          | 3175                               | 13314                                   |
| <b>Primary Outcome</b>                                |                             |                                       |                                                      |                                             |                                |                                    |                                         |
| Total institutional spending over 90-d episode        | -1008 (-1603, -414)         | -1086 (-1665, -507)                   | -894 (-1585, -203)                                   | -761 (-1420, -101)                          | -981 (-1667, -294)             | -925 (-2116, 265)                  | -1244 (-1895, -594)                     |
| <b>Secondary Payment Outcomes</b>                     |                             |                                       |                                                      |                                             |                                |                                    |                                         |
| Overall SNF spending                                  | -981 (-1446, -516)          | -312 (-576, -48)                      | -883 (-1402, -365)                                   | -860 (-1348, -373)                          | -826 (-1353, -300)             | -1431 (-2404, -458)                | -1199 (-1714, -684)                     |
| Initial SNF stay                                      | -847 (-1253, -440)          | -953 (-1407, -498)                    | -814 (-1241, -387)                                   | -814 (-1224, -404)                          | -632 (-1074, -189)             | -1524 (-2463, -585)                | -1056 (-1518, -594)                     |
| Subsequent SNF stays                                  | -134 (-381, 113)            | -180 (-414, 54)                       | -69 (-361, 222)                                      | -46 (-324, 232)                             | -194 (-487, 98)                | 93 (-343, 528)                     | -143 (-399, 113)                        |
| Readmission                                           | -106 (-315, 103)            | -95 (-226, 36)                        | -56 (-304, 193)                                      | -15 (-253, 224)                             | -158 (-402, 87)                | 122 (-279, 523)                    | -132 (-374, 110)                        |
| Inpatient rehabilitation facility                     | -87 (-257, 84)              | 59 (-18, 137)                         | -150 (-361, 60)                                      | -52 (-238, 134)                             | -149 (-358, 61)                | 147 (-51, 346)                     | -87 (-257, 84)                          |
| Long term acute care hospital                         | 48 (-28, 125)               | -348 (-666, -29)                      | 57 (-30, 143)                                        | 44 (-51, 140)                               | 24 (-68, 116)                  | 137 (16, 257)                      | 48 (-28, 125)                           |
| Home health agency                                    | 117 (38, 196)               | 80 (2, 157)                           | 138 (52, 225)                                        | 123 (30, 216)                               | 127 (41, 213)                  | 102 (-87, 292)                     | 126 (44, 208)                           |
| Durable medical equipment                             | 0 (-3, 3)                   | 2 (0, 4)                              | 1 (-2, 4)                                            | -1 (-4, 2)                                  | 0 (-3, 3)                      | -2 (-8, 3)                         | -1 (-5, 3)                              |
| <b>Utilization and Discharge Outcomes</b>             |                             |                                       |                                                      |                                             |                                |                                    |                                         |
| Average Length of Stay, Initial SNF Admission (Days)  | -1.5 (-2.4, -0.7)           | 2.5 (1.5, 3.5)                        | -1.4 (-2.4, -0.5)                                    | -1.6 (-2.5, -0.7)                           | -1.2 (-2.1, -0.2)              | -2.9 (-4.9, -0.9)                  | -                                       |
| Average Number of SNF Days, Full Bundle Period (Days) | -2 (-2.9, -1.1)             | 0 (-0.1, 0)                           | -2 (-3, -1)                                          | -1.7 (-2.7, -0.8)                           | -1.8 (-2.8, -0.7)              | -2.7 (-4.6, -0.8)                  | -                                       |
| Average Days at Home during Bundle Period (Days)      | 2.3 (1.2, 3.3)              | -1.5 (-2.3, -0.7)                     | 2.3 (1.1, 3.4)                                       | 2 (0.9, 3.1)                                | 2.4 (1.2, 3.5)                 | 1.9 (-0.4, 4.2)                    | -                                       |
| Discharged Home after Initial SNF Stay (%)            | -2.2 (-6.1, 1.8)            | -184.6 (-271.2, -98.1)                | -3 (-7.5, 1.4)                                       | -2.3 (-6.4, 1.8)                            | -2.8 (-7.5, 1.9)               | 0.9 (-5.3, 7)                      | -                                       |

|                                                   |                             |                                       |                                                      |                                             |                                |                                    |                                         |
|---------------------------------------------------|-----------------------------|---------------------------------------|------------------------------------------------------|---------------------------------------------|--------------------------------|------------------------------------|-----------------------------------------|
| Use of Home Health Agency after SNF Discharge (%) | 3.6 (1.4, 5.8)              | 2.6 (0.4, 4.8)                        | 4.2 (1.8, 6.6)                                       | 3.6 (1, 6.3)                                | 3.5 (1.1, 5.9)                 | 4.2 (-0.8, 9.2)                    | -                                       |
|                                                   |                             |                                       |                                                      |                                             |                                |                                    |                                         |
|                                                   | Main Analysis in Manuscript | Alternate Time Definition (eFigure 2) | Excluding all Admissions from BPCI Model 2 Hospitals | Excluding all Admissions from CJR Hospitals | Only Including SNFs in a Chain | Only Including SNFs NOT in a Chain | Main Analysis without Winsorizing Costs |
| <b>Patient Outcomes</b>                           |                             |                                       |                                                      |                                             |                                |                                    |                                         |
| ED Use without Admission                          |                             |                                       |                                                      |                                             |                                |                                    |                                         |
| 30 Day                                            | 0.7 (-0.9, 2.2)             | -0.2 (-0.6, 0.2)                      | 0.5 (-1.2, 2.3)                                      | 1 (-0.9, 2.9)                               | 2.2 (-0.7, 5.1)                | 0.3 (-4.1, 4.7)                    | -                                       |
| 90 Day                                            | 1.8 (-0.7, 4.3)             | 0.3 (-0.3, 0.9)                       | 0.1 (-2.8, 3.1)                                      | 1.7 (-1.3, 4.7)                             | -0.7 (-2.9, 1.5)               | 1.5 (-1.3, 4.2)                    | -                                       |
| Inpatient Readmission                             |                             |                                       |                                                      |                                             |                                |                                    |                                         |
| 30 Day                                            | -0.4 (-1.4, 0.6)            | -1.6 (-2.7, -0.5)                     | 0 (-1.2, 1.2)                                        | -0.1 (-1.3, 1)                              | -0.6 (-1.8, 0.6)               | 0.4 (-1.7, 2.4)                    | -                                       |
| 90 Day                                            | -0.5 (-1.9, 0.8)            | -1.6 (-3, -0.2)                       | 0.2 (-1.3, 1.7)                                      | -0.1 (-1.6, 1.5)                            | -0.5 (-2.1, 1.1)               | -0.4 (-3.1, 2.2)                   | -                                       |
| Mortality                                         |                             |                                       |                                                      |                                             |                                |                                    |                                         |
| 30 Day                                            | -0.2 (-0.7, 0.3)            | -0.4 (-0.9, 0.1)                      | -0.2 (-0.7, 0.4)                                     | -0.1 (-0.7, 0.5)                            | -0.4 (-1, 0.2)                 | 0.3 (-0.6, 1.1)                    | -                                       |

Abbreviations: Bundled Payment for Care Improvement (BPCI), 95% confidence interval (95% CI), emergency department (ED), skilled nursing facility (SNF)

Adjusted estimates show the differential change in spending outcomes during the 90-day post-admission bundle period between treatment and control groups after vs. before BPCI implementation. In contrast to the main analysis, these estimates use varying approaches to the sample or analysis as described in the column headings. All estimates use standard errors clustered at the SNF level. The differential change estimates can be interpreted as the average within-SNF change attributable to BPCI implementation. For outcome definitions, see Tables 3-5 in the main manuscript.
